# Supplementary material for: Combination of a graphene SERS substrate and magnetic solid phase micro-extraction used for the rapid detection of trace illegal additives
Source: Royal Society of Chemistry journal article supplement (doi:10.1039/c7an01547j), 2018-01-01
Supplement: c7an01547j1.pdf [file c7an01547j1.pdf]

## Combination use of graphene SERS substrate and magnetic solid phase micro-extraction for rapid detection of trace illegal additives

Shihua Yu,<sup>ab</sup> Zhigang Liu,<sup>c</sup> Hongwei Li,<sup>a</sup> Jianpo Zhang,<sup>b</sup> Xin-xin Yuan,<sup>a</sup> Xiangyu Jia,<sup>a</sup> Yuqing Wu<sup>a\*</sup>

(Supporting Information)

### 1. Characterization of Fe<sub>3</sub>O<sub>4</sub>@GO@Ag and GO.

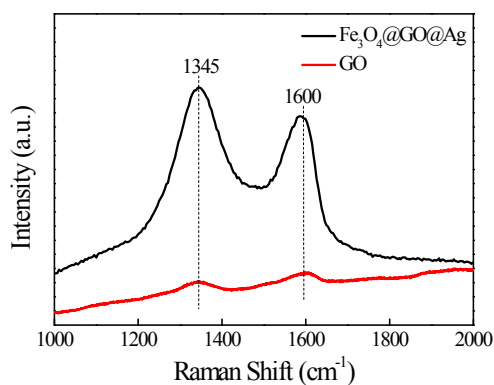

**Fig. S1.** Raman spectra of Fe<sub>3</sub>O<sub>4</sub>@GO@Ag and GO, the peak intensities of D and G bands were enhanced greatly in Fe<sub>3</sub>O<sub>4</sub>@GO@Ag due to the loading of silver nanoparticles at surface.

### 2. Sensitivity of Dis-MSPME-SERS to CAP

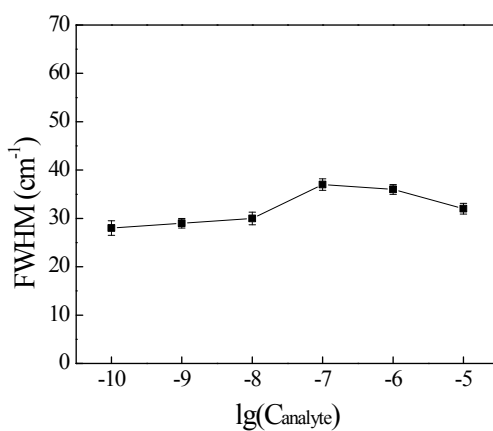

**Fig. S2.** The FWHM of the bands at 1345 cm<sup>-1</sup> changes with CAP concentration.

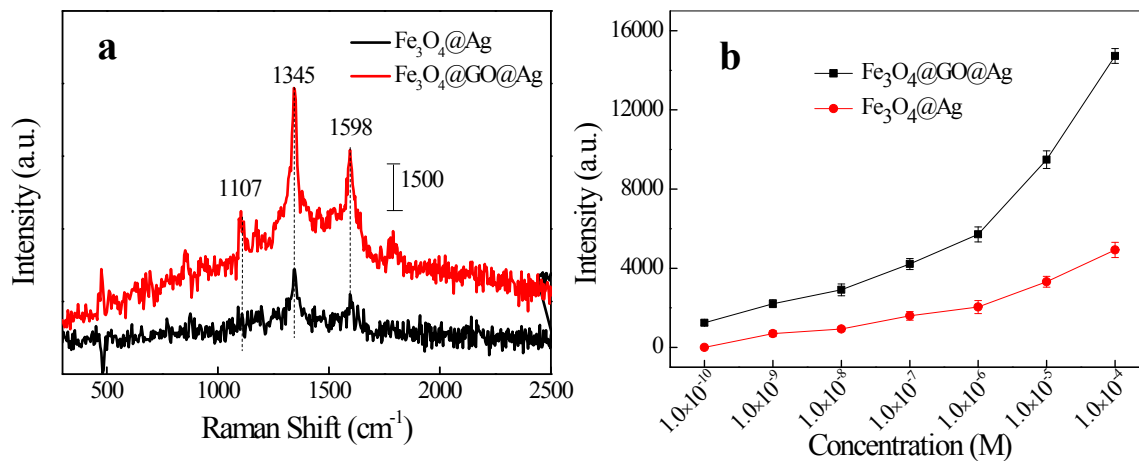

**Fig. S3.** (a) SERS spectrum of CAP ( $1.0 \times 10^{-9}$  M) on the  $\text{Fe}_3\text{O}_4@\text{GO}@Ag$  and  $\text{Fe}_3\text{O}_4@Ag$  particles, respectively; (b) The corresponding Raman intensity variations at  $1345 \text{ cm}^{-1}$  with different concentrations of CAP on two substrate, respectively.

### 3. Adsorption experiment

The adsorption of CAP on graphene was performed. The experimental steps were depicted as follows: 30 mg  $\text{Fe}_3\text{O}_4@\text{GO}@Ag$  or  $\text{Fe}_3\text{O}_4@Ag$  was added into the solution of CAP ( $50 \text{ mL} \times 50 \mu\text{g/mL}$ ) at room temperature by stirring. Then, then the adsorbent was separated by using an external magnetic field. The adsorption concentration of CAP was finally detected by HPLC (Fig. S4). The adsorption capacity  $Q$  (mg/g) of the analyte was defined as:

$$Q = \frac{(C_0 - C_t) * V}{m}$$

where  $C_0$  ( $\mu\text{g/mL}$ ) is the initial concentration of analyte, while  $C_t$  ( $\mu\text{g/mL}$ ) is the concentration of it left in supernatant solution after  $t$  min,  $V$  (mL) is the volume of the initial solution and  $m$  (g) is the mass of the adsorbent.

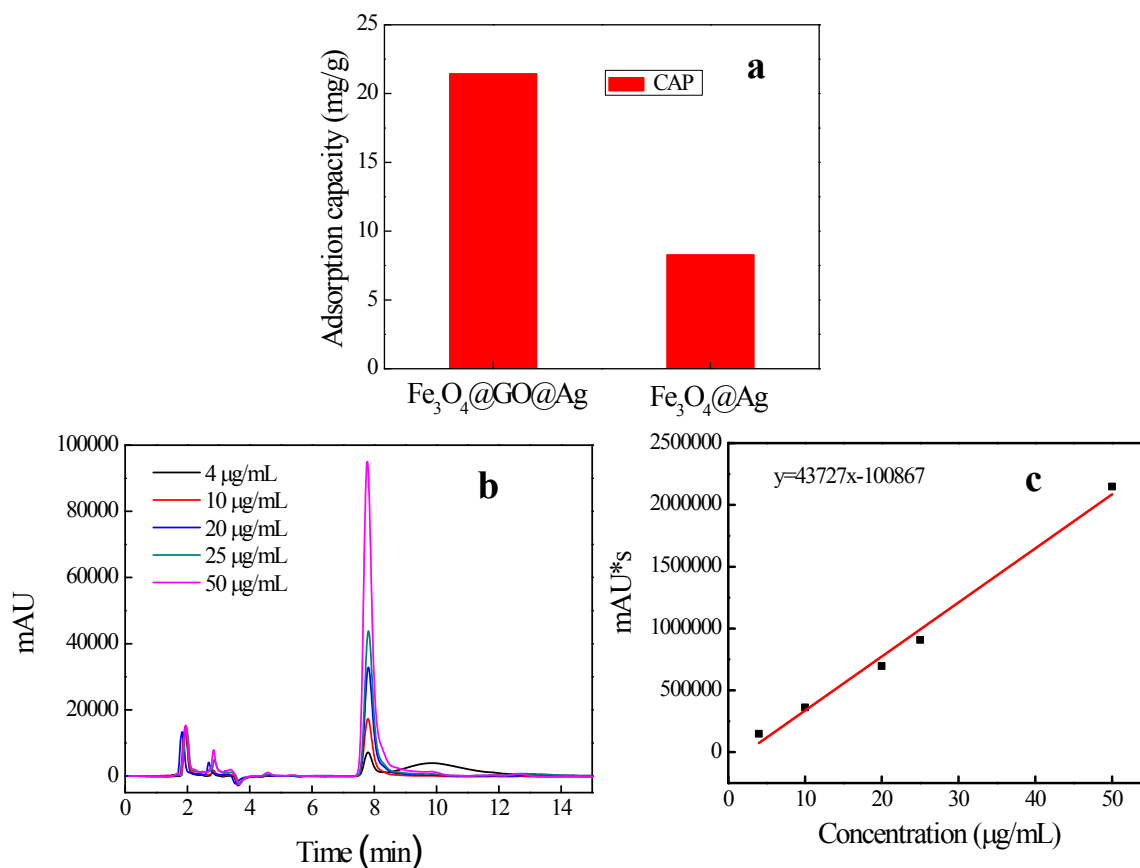

**Fig. S4.** (a) The comparison of the adsorption capacities of CAP on the surface of Fe<sub>3</sub>O<sub>4</sub>@GO@Ag and Fe<sub>3</sub>O<sub>4</sub>@Ag, respectively, after mixing of them in 20 min; (b) Chromatograms of CAP at different concentrations; (c) Standard curves of CAP from the data of (b).

#### 4. Stability of the magnetic particles

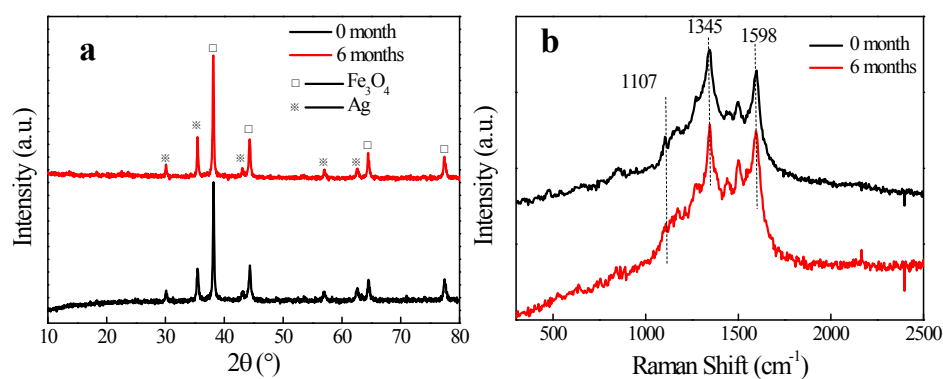

**Fig. S5.** (a) XRD pattern of Fe<sub>3</sub>O<sub>4</sub>@GO@Ag and (b) SERS spectra of CAP (1.0 × 10<sup>-9</sup> M) on Fe<sub>3</sub>O<sub>4</sub>@GO@Ag after 0 and 6 months storage in water, respectively.

**Table S1.** 2θ value of Fe<sub>3</sub>O<sub>4</sub>@GO@Ag, Ag, Ag<sub>2</sub>O.

| Nano particle                         | 2θ/(°) |      |      |      |
|---------------------------------------|--------|------|------|------|
| Fe <sub>3</sub> O <sub>4</sub> @GO@Ag | 38.0   | 44.1 | 64.4 | 77.2 |
| Ag                                    | 38.2   | 44.2 | 64.4 | 77.4 |
| Ag <sub>2</sub> O                     | 26.6   | 32.8 | 38.3 | 54.9 |
